# Supplementary material for: Development of a computational promoter with highly efficient expression in tumors
Source: Springer Nature journal article supplement (doi:10.1186/s12885-018-4421-7), 2018-04-27
Supplement: MOESM1 [file 15725478]

**Additional file 1. Gene-specific primers for RT-PCR**

---

| Gene         | species | Orientation | Sequence                        |
|--------------|---------|-------------|---------------------------------|
| <i>NFKB1</i> | Human   | Forward     | 5'-ATGGCAGAAGATGATCCATATTTG-3'  |
|              |         | Reverse     | 5'-TTTTCCCGATCTCCCAGCTGC-3'     |
| <i>HIF1A</i> | Human   | Forward     | 5'-ACGACAAGAAAAAGATAAGTTCTGA-3' |
|              |         | Reverse     | 5'-TGCAGTGCAATACCTTCCATGTT-3'   |
| <i>CREB1</i> | Human   | Forward     | 5'-TGACCATGGAATCTGGAGCCG-3'     |
|              |         | Reverse     | 5'-TGGGTAATGGCAATATACTGTCC-3'   |
| <i>GAPDH</i> | Human   | Forward     | 5'-CCAGCCGAGCCACATCGCTC-3'      |
|              |         | Reverse     | 5'-ATGAGCCCCAGCCTTCTCCAT-3'     |
| <i>NFKB1</i> | Mouse   | Forward     | 5'-ATGGACGATCTGTTTCCCCT-3'      |
|              |         | Reverse     | 5'-ACCTCAATGTCTTCTTTCTGC-3'     |
| <i>HIF1A</i> | Mouse   | Forward     | 5'-AGAACGAGAAGAAAAAGATGAG-3'    |
|              |         | Reverse     | 5'-CATCAACTCAGTAATTCTTTCAT-3'   |
| <i>CREB1</i> | Mouse   | Forward     | 5'-ATGACCATGGAATCTGGAGC-3'      |
|              |         | Reverse     | 5'-ATCGCCTGAGGCAGCTTGA-3'       |
| <i>ACTB</i>  | Mouse   | Forward     | 5'-TTGGGTATGGAATCCTGTGG3-3'     |
|              |         | Reverse     | 5'-TCGTACTCCTGCTTGCTGAT-3'      |

---
