# Supplementary material for: Development of a computational promoter with highly efficient expression in tumors
Source: Springer Nature journal article supplement (doi:10.1186/s12885-018-4421-7), 2018-04-27
Supplement: MOESM2 [file 15725478]

## Additional file 2. D5 mini-promoter primers

---

| Name   | Sequence 5' to 3'                                                                       |
|--------|-----------------------------------------------------------------------------------------|
| 5'-D51 | CGCGTGGGACTTTCCGCTGGGGACTTTCCGCTGGGGACTTTCCGCTGT<br><b>GACGTCAGAGAG</b>                 |
| 3'-D52 | <b>TCAGCTCTCTGACGTCACAGCGGAAAGTCCCCAGCGGAAAGTCCCCA</b><br>GCGGAAAGTCCCA                 |
| 5'-D53 | CT <b>GACGTCAGAGAGCTGACGTCAGAGAGCT</b> <u>TACGTGTGTGTACGTGTG</u><br>TGT <u>TACGTGAT</u> |
| 3'-D54 | CGAT <u>CACGTACACACACGTA</u> CACACACGTA <u>GCTCTCTGACGTCAGCTC</u><br>TCT <b>GACG</b>    |

---

The binding sites of NF- $\kappa$ b (underlined), CREB (bold), and HIF-1 $\alpha$  (dotted) were labeled
