# Supplementary material for: Development of a computational promoter with highly efficient expression in tumors
Source: Springer Nature journal article supplement (doi:10.1186/s12885-018-4421-7), 2018-04-27
Supplement: MOESM3 [file 15725478]

### **Additional file 3. The genes of regulate angiogenesis and cell growth**

#### **Angiogenesis & Cell growth**

---

*GATA6* 、 *LEF1* 、 *NOV* 、 *PKNOX1* 、 *PML* 、 *SOX17* 、 *SRF* 、 *XPB1*

---

#### **Angiogenesis (GO:0001525)**

---

*BRCA1* 、 *E2F7* 、 *CTNNB1* 、 *E2F8* 、 *EGR3* 、 *ELK3* 、 *EPAS1* 、 *ETS1* 、 *FOXC1* 、 *FOXC2* 、  
*FOXO4* 、 *GATA2* 、 *GATA4* 、 *GATA6* 、 *GBX2* 、 *GTF2I* 、 *HAND1* 、 *HAND2* 、 *HDAC5* 、 *HEY1* 、  
*HHEX* 、 *HIF1A* 、 *HIF3A* 、 *HMGB1* 、 *HOXA3* 、 *HOXA5* 、 *HOXA7* 、 *HOXB13* 、 *HOXB3* 、 *ID1* 、  
*IL18* 、 *ISL1* 、 *JUN* 、 *KDR* 、 *KLF4* 、 *KLF5* 、 *LEF1* 、 *MAP3K7* 、 *MEIS1* 、 *MEOX2* 、 *NF1* 、  
*NFATC3* 、 *NFATC4* 、 *NOV* 、 *NR2E1* 、 *NR4A1* 、 *OVOL2* 、 *PITX2* 、 *PKNOX1* 、 *PML* 、 *RBPJ* 、  
*SHH* 、 *SOX17* 、 *SOX18* 、 *SPI1* 、 *SRF* 、 *STAT1* 、 *TAL1* 、 *TBX1* 、 *TBX20* 、 *TBX4* 、 *TCF21* 、  
*TWIST1* 、 *UBP1* 、 *VEZF1* 、 *XPB1* 、 *ZNF304* 、 *RORA*

---

#### **Cell growth (GO:0016049)**

---

*ABL1* 、 *ADNP* 、 *ADNP2* 、 *AR* 、 *BCL11A* 、 *BCL6* 、 *CREB1* 、 *CREB3* 、 *DNAJC2* 、 *EMX1* 、  
*ENO1* 、 *ESR2* 、 *FOXK1* 、 *FOXL2* 、 *FOXMI* 、 *FXN* 、 *HNF4A* 、 *IGFBP1* 、 *ING1* 、 *LICAM* 、  
*LHX2* 、 *LMX1A* 、 *MSX1* 、 *MYOCD* 、 *NKX6-1* 、 *NFKB1* 、 *NOTCH2* 、 *POU4F2* 、 *POU4F3* 、  
*PPARD* 、 *PPARG* 、 *PRDM4* 、 *RARG* 、 *SIRT6* 、 *SMAD3* 、 *SMAD4* 、 *SMARCA2* 、 *SMARCA4* 、  
*SOX9* 、 *TAF9* 、 *TP53* 、 *WT1* 、 *ZNF639*

---
