# Supplementary material for: Development of a computational promoter with highly efficient expression in tumors
Source: BMC Cancer. 2018 Apr 27;18:480. doi: 10.1186/s12885-018-4421-7 (PMC5924487; doi:10.1186/s12885-018-4421-7)
Supplement: Supplementary file 6 — Cooperativity analysis of NF-κB, CREB and HIF-1α. The protein-protein interaction of (A) NF-κB with CREB, (B) NF-κB with HIF-1α, and (C) CREB with HIF-1α were analyzed by GENEMANIA. The pink line indicates physical interaction, which is the highest interaction in the network. The purple, light blue, dark blue and green lines indicate that the protein has an interaction with the TF with different effects, co-expression, the involved pathway, co-localization and genetic interaction, respectively. (PDF 212 kb) [file 12885_2018_4421_MOESM6_ESM.pdf]

A

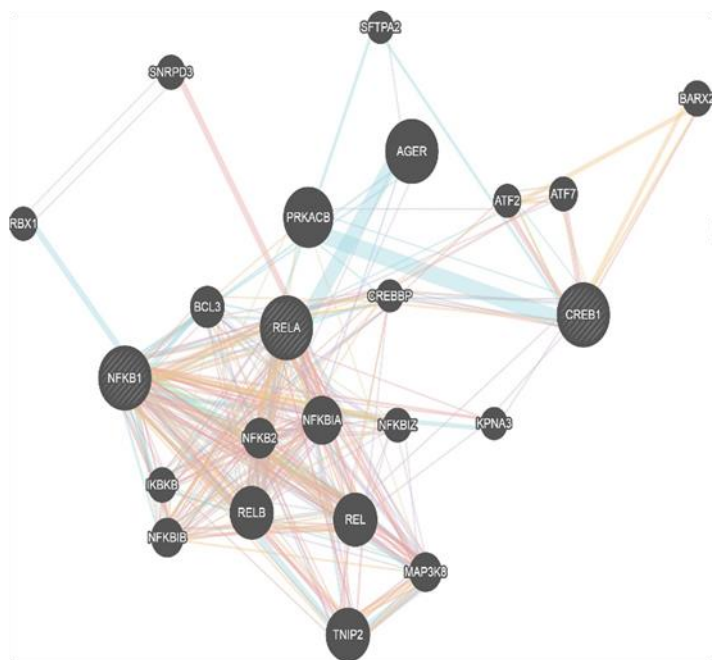

B

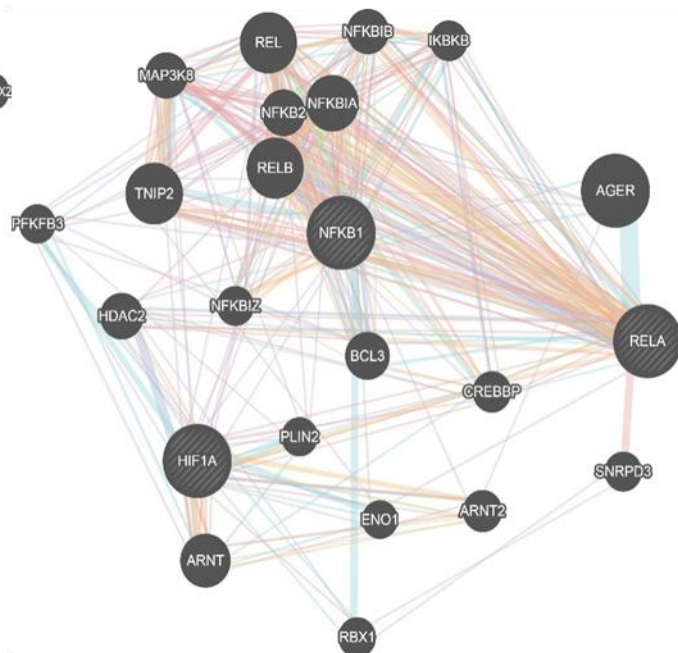

C

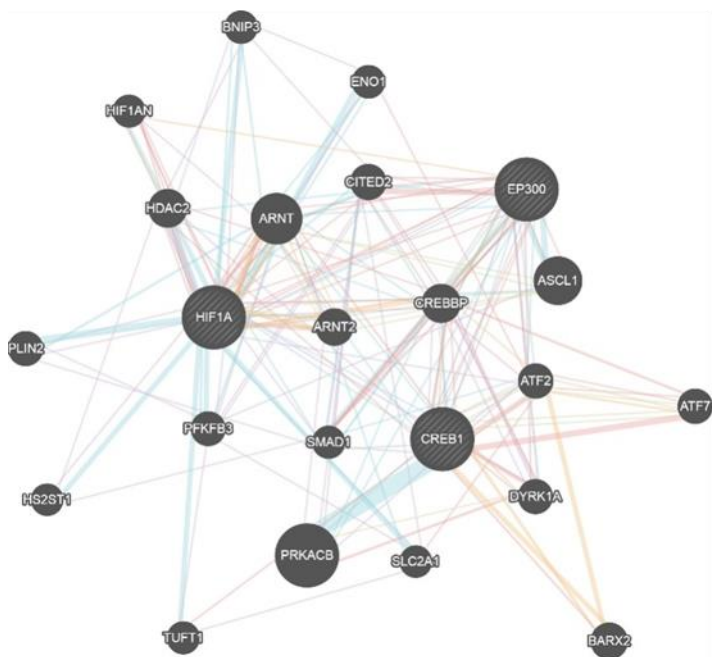

## Networks

- Physical interactions
- Co-expression
- Pathway
- Co-localization
- Genetic interactions

**Additional file 6.** Cooperativity analysis of NF- $\kappa$ B, CREB and HIF-1 $\alpha$ . The protein-protein interaction of (A) NF- $\kappa$ B with CREB, (B) NF- $\kappa$ B with HIF-1 $\alpha$ , and (C) CREB with HIF-1 $\alpha$  were analyzed by GENEMANIA. The pink line indicates physical interaction, which is the highest interaction in the network. The purple, light blue, dark blue and green lines indicate that the protein has an interaction with the TF with different effects, co-expression, the involved pathway, co-localization and genetic interaction, respectively.
